# Supplementary material
Source: PubMed Central journal article supplement (PMC4819005)

# **SR2067 reveals a unique kinetic and structural signature for PPAR $\gamma$ partial agonism**

**Laura M. van Marrewijk<sup>a</sup>, Steven W. Polyak<sup>a</sup>, Marcel Hijnen<sup>c</sup>, Dana Kuruvilla<sup>b</sup>, Mi Ra Chang<sup>b</sup>,  
Youseung Shin<sup>b</sup>, Theodore M. Kamenecka<sup>b</sup>, Patrick R. Griffin<sup>b</sup> and John B. Bruning<sup>a,1</sup>**

<sup>a</sup>School of Biological Sciences

The University of Adelaide

Adelaide, South Australia, 5005, Australia

<sup>b</sup>Department of Molecular Therapeutics

The Scripps Research Institute, Scripps Florida

Jupiter, FL33458, USA

<sup>c</sup>GE Healthcare Life Sciences ANZ

Melbourne, Victoria 3121, Australia

<sup>1</sup>To whom correspondence should be addressed. John B. Bruning, School of Biological Sciences, Adelaide, South Australia, Australia, Tel.: +61 (08) 8313-5218; Fax: +61 (08) 8313-4362; E-mail: [john.bruning@adelaide.edu.au](mailto:john.bruning@adelaide.edu.au)

**Supplemental Figure 1. Electron density for SR2067.** SR2067 is depicted in sticks with carbon atoms colored purple. The electron density map is a  $2F_o - F_c$  “kicked” map contoured at 1 sigma. The image is wall-eye stereo.

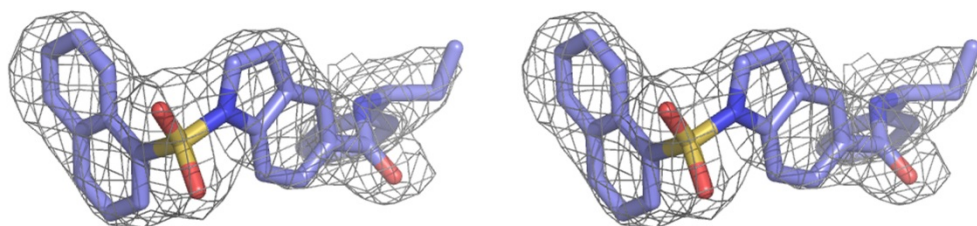

Supplement: NIHMS769854-supplement-Supporting_Info.pdf [file NIHMS769854-supplement-Supporting_Info.pdf]
